# Supplementary material
Source: Springer Nature journal article supplement (https://www.springermedizin.de/resource/supplementary/13024_2013_521_MOESM5_ESM.pdf/9644394)
Supplement: MOESM5 [file 9644394]

**Additional file 5**

**Statistical analysis of geotaxis assay.**

| Age | <i>elav-GAL4/BRI<sub>2</sub>-23</i> x2 |           |   | <i>elav-GAL4/Aβ42</i> x2 |           |   | <i>elav-GAL4/ABri</i> x2 |           |   | <i>elav-GAL4/ADan</i> x2 |           |   |
|-----|----------------------------------------|-----------|---|--------------------------|-----------|---|--------------------------|-----------|---|--------------------------|-----------|---|
|     | Mean                                   | SEM       | N | Mean                     | SEM       | N | Mean                     | SEM       | N | Mean                     | SEM       | N |
| 7   | 4,656415                               | 0,2192307 | 3 | 4,616077                 | 0,1463194 | 3 | 3,859194                 | 0,1895314 | 3 | 2,519642                 | 0,7548203 | 3 |
| 15  | 3,834954                               | 0,1079299 | 3 | 3,588669                 | 0,160441  | 3 | 2,380756                 | 0,2895665 | 3 | 1,418514                 | 0,3269992 | 3 |
| 21  | 2,991749                               | 0,1855949 | 3 | 1,468902                 | 0,2733525 | 3 | 1,13085                  | 0,3163382 | 3 | 1,393163                 | 0,1397144 | 3 |

**Two-way, repeated measures, ANOVA, followed by Bonferroni `s Multiple Comparisons, (GraphPad, Prism 5)**

|                                  |              |           |            |                     |
|----------------------------------|--------------|-----------|------------|---------------------|
| <b>elav-BRI2-23 vs elav-Aβ42</b> |              |           |            |                     |
| genotype                         | elav-BRI2-23 | elav-Aβ42 | Difference | 95% CI of diff,     |
| 7                                | 4,656        | 4,616     | -0,04034   | -1,488 to 1,407     |
| 15                               | 3,835        | 3,589     | -0,2463    | -1,694 to 1,202     |
| 21                               | 2,992        | 1,469     | -1,523     | -2,971 to -0,07504  |
| genotype                         | Difference   | t         | P value    | Summary             |
| 7                                | -0,04034     | 0,09286   | P > 0,05   | ns                  |
| 15                               | -0,2463      | 0,5670    | P > 0,05   | ns                  |
| 21                               | -1,523       | 3,506     | P<0,01     | **                  |
| <b>elav-BRI2-23 vs elav-ABri</b> |              |           |            |                     |
| genotype                         | elav-BRI2-23 | elav-ABri | Difference | 95% CI of diff,     |
| 7                                | 4,656        | 3,859     | -0,7972    | -2,245 to 0,6506    |
| 15                               | 3,835        | 2,381     | -1,454     | -2,902 to -0,006394 |
| 21                               | 2,992        | 1,131     | -1,861     | -3,309 to -0,4131   |
| genotype                         | Difference   | t         | P value    | Summary             |
| 7                                | -0,7972      | 1,835     | P > 0,05   | ns                  |
| 15                               | -1,454       | 3,348     | P<0,01     | **                  |
| 21                               | -1,861       | 4,284     | P<0,001    | ***                 |
| <b>elav-BRI2-23 vs elav-ADan</b> |              |           |            |                     |
| genotype                         | elav-BRI2-23 | elav-ADan | Difference | 95% CI of diff,     |
| 7                                | 4,656        | 2,520     | -2,137     | -3,585 to -0,6890   |
| 15                               | 3,835        | 1,419     | -2,416     | -3,864 to -0,9686   |
| 21                               | 2,992        | 1,393     | -1,599     | -3,046 to -0,1508   |
| genotype                         | Difference   | t         | P value    | Summary             |
| 7                                | -2,137       | 4,919     | P<0,001    | ***                 |
| 15                               | -2,416       | 5,563     | P<0,001    | ***                 |
| 21                               | -1,599       | 3,680     | P<0,01     | **                  |
| <b>elav-Aβ42 vs elav-ABri</b>    |              |           |            |                     |
| genotype                         | elav-Aβ42    | elav-ABri | Difference | 95% CI of diff,     |

|                        |            |           |            |                   |
|------------------------|------------|-----------|------------|-------------------|
| 7                      | 4,616      | 3,859     | -0,7569    | -2,205 to 0,6909  |
| 15                     | 3,589      | 2,381     | -1,208     | -2,656 to 0,2399  |
| 21                     | 1,469      | 1,131     | -0,3381    | -1,786 to 1,110   |
| genotype               | Difference | t         | P value    | Summary           |
| 7                      | -0,7569    | 1,742     | P > 0,05   | ns                |
| 15                     | -1,208     | 2,781     | P < 0,05   | *                 |
| 21                     | -0,3381    | 0,7783    | P > 0,05   | ns                |
| elav-Aβ42 vs elav-ADan |            |           |            |                   |
| genotype               | elav-Aβ42  | elav-ADan | Difference | 95% CI of diff,   |
| 7                      | 4,616      | 2,520     | -2,096     | -3,544 to -0,6486 |
| 15                     | 3,589      | 1,419     | -2,170     | -3,618 to -0,7224 |
| 21                     | 1,469      | 1,393     | -0,07574   | -1,524 to 1,372   |
| genotype               | Difference | t         | P value    | Summary           |
| 7                      | -2,096     | 4,826     | P<0,001    | ***               |
| 15                     | -2,170     | 4,996     | P<0,001    | ***               |
| 21                     | -0,07574   | 0,1744    | P > 0,05   | ns                |
| elav-ABri vs elav-ADan |            |           |            |                   |
| genotype               | elav-ABri  | elav-ADan | Difference | 95% CI of diff,   |
| 7                      | 3,859      | 2,520     | -1,340     | -2,787 to 0,1083  |
| 15                     | 2,381      | 1,419     | -0,9622    | -2,410 to 0,4856  |
| 21                     | 1,131      | 1,393     | 0,2623     | -1,185 to 1,710   |
| genotype               | Difference | t         | P value    | Summary           |
| 7                      | -1,340     | 3,084     | P < 0,05   | *                 |
| 15                     | -0,9622    | 2,215     | P > 0,05   | ns                |
| 21                     | 0,2623     | 0,6039    | P > 0,05   | ns                |

### Statistical analysis of Phototaxis assay.

|     | <i>elav-GAL4/BRI<sub>2-23</sub> x1</i> |          |   | <i>elav-GAL4/Aβ42 x1</i> |          |   | <i>elav-GAL4/ABri x1</i> |          |   | <i>elav-GAL4/ADan x1</i> |          |   |
|-----|----------------------------------------|----------|---|--------------------------|----------|---|--------------------------|----------|---|--------------------------|----------|---|
| Age | Mean                                   | SEM      | N | Mean                     | SEM      | N | Mean                     | SEM      | N | Mean                     | SEM      | N |
| 5   | 68,30296                               | 3,884292 | 3 | 77,92404                 | 7,68356  | 3 | 73,13538                 | 5,379315 | 3 | 52,28471                 | 14,59665 | 3 |
| 25  | 71,93841                               | 5,813278 | 3 | 68,99335                 | 3,707666 | 3 | 65,77213                 | 4,37508  | 3 | 46,19212                 | 6,752286 | 3 |

### Two-way, repeated measures, ANOVA, followed by Bonferroni `s Multiple Comparisons, (GraphPad, Prism 5)

|                                               |  |                              |               |            |                 |
|-----------------------------------------------|--|------------------------------|---------------|------------|-----------------|
| elavGAL4-BRI <sub>2-23</sub> vs elavGAL4-Aβ42 |  |                              |               |            |                 |
| Column Factor                                 |  | elavGAL4-BRI <sub>2-23</sub> | elavGAL4-Aβ42 | Difference | 95% CI of diff, |
| 5                                             |  | 68,30                        | 77,92         | 9,621      | -24,93 to 44,17 |
| 25                                            |  | 71,94                        | 68,99         | -2,945     | -37,50 to 31,61 |
| Column Factor                                 |  | Difference                   | t             | P value    | Summary         |
| 5                                             |  | 9,621                        | 0,9297        | P > 0,05   | ns              |

|                                                |                               |               |            |                 |
|------------------------------------------------|-------------------------------|---------------|------------|-----------------|
| 25                                             | -2,945                        | 0,2846        | P > 0,05   | ns              |
| elavGAL4-BRI <sub>2</sub> -23 vs elavGAL4-ABri |                               |               |            |                 |
| Column Factor                                  | elavGAL4-BRI <sub>2</sub> -23 | elavGAL4-ABri | Difference | 95% CI of diff, |
| 5                                              | 68,30                         | 73,14         | 4,832      | -29,72 to 39,38 |
| 25                                             | 71,94                         | 65,77         | -6,166     | -40,72 to 28,38 |
| Column Factor                                  | Difference                    | t             | P value    | Summary         |
| 5                                              | 4,832                         | 0,4669        | P > 0,05   | ns              |
| 25                                             | -6,166                        | 0,5958        | P > 0,05   | ns              |
| elavGAL4-BRI <sub>2</sub> -23 vs elavGAL4-ADan |                               |               |            |                 |
| Column Factor                                  | elavGAL4-BRI <sub>2</sub> -23 | elavGAL4-ADan | Difference | 95% CI of diff, |
| 5                                              | 68,30                         | 52,28         | -16,02     | -50,57 to 18,53 |
| 25                                             | 71,94                         | 46,19         | -25,75     | -60,30 to 8,804 |
| Column Factor                                  | Difference                    | t             | P value    | Summary         |
| 5                                              | -16,02                        | 1,548         | P > 0,05   | ns              |
| 25                                             | -25,75                        | 2,488         | P < 0,05   | *               |
| elavGAL4-Aβ <sub>42</sub> vs elavGAL4-ABri     |                               |               |            |                 |
| Column Factor                                  | elavGAL4-Aβ <sub>42</sub>     | elavGAL4-ABri | Difference | 95% CI of diff, |
| 5                                              | 77,92                         | 73,14         | -4,789     | -39,34 to 29,76 |
| 25                                             | 68,99                         | 65,77         | -3,221     | -37,77 to 31,33 |
| Column Factor                                  | Difference                    | t             | P value    | Summary         |
| 5                                              | -4,789                        | 0,4627        | P > 0,05   | ns              |
| 25                                             | -3,221                        | 0,3113        | P > 0,05   | ns              |
| elavGAL4-Aβ <sub>42</sub> vs elavGAL4-ADan     |                               |               |            |                 |
| Column Factor                                  | elavGAL4-Aβ <sub>42</sub>     | elavGAL4-ADan | Difference | 95% CI of diff, |
| 5                                              | 77,92                         | 52,28         | -25,64     | -60,19 to 8,911 |
| 25                                             | 68,99                         | 46,19         | -22,80     | -57,35 to 11,75 |
| Column Factor                                  | Difference                    | t             | P value    | Summary         |
| 5                                              | -25,64                        | 2,477         | P < 0,05   | *               |
| 25                                             | -22,80                        | 2,203         | P > 0,05   | ns              |
| elavGAL4-ABri vs elavGAL4-ADan                 |                               |               |            |                 |
| Column Factor                                  | elavGAL4-ABri                 | elavGAL4-ADan | Difference | 95% CI of diff, |
| 5                                              | 73,14                         | 52,28         | -20,85     | -55,40 to 13,70 |
| 25                                             | 65,77                         | 46,19         | -19,58     | -54,13 to 14,97 |
| Column Factor                                  | Difference                    | t             | P value    | Summary         |
| 5                                              | -20,85                        | 2,015         | P > 0,05   | ns              |
| 25                                             | -19,58                        | 1,892         | P > 0,05   | ns              |
